# Supplementary material
Source: Springer Nature journal article supplement (https://www.springermedizin.de/resource/supplementary/13058_2008_2065_MOESM2_ESM.pdf/9700556)
Supplement: MOESM2 [file 9700556]

**SUPPLEMENTARY INFORMATION Brozkova et al. Table C**

**Classification of patients according to hierarchical clustering.**

| Categorization |   | Patients in the group |                                                                               |
|----------------|---|-----------------------|-------------------------------------------------------------------------------|
| 1              | A | I                     | 1,3,5,11,12,13,14,22,23,24,39,41,43,46,51,54,55,56,57,60,62,68,76,81,83,84,96 |
|                |   | II                    | 2,16,25,36,37,42,45,58,67,69,70,71,72,80,82,86,94,95,98,99,100,102,104        |
|                | B | III                   | 4,19,26,27,31,33,34,35,38,40,47,50,53,59,61,64,66,73,74,79,85,91,92,103       |
| 2              | C | IV                    | 6,7,8,9,10,15,17,18,21,28,32,44,48,65,75,77,87,88,89,93,97,105                |
|                |   | V                     | 20,29,30,49,52,63,78,90,101                                                   |
